# Supplementary material
Source: PubMed Central journal article supplement (PMC6547245)
Supplement: jamainternmed-179-1211-s001.pdf [file jamainternmed-179-1211-s001.pdf]

## Supplementary Online Content

Ganguli I, Lupo C, Mainor AJ, et al. Prevalence and cost of care cascades after low-value preoperative electrocardiogram for cataract surgery in fee-for-service Medicare beneficiaries. *JAMA Intern Med*. Published online June 3, 2019. doi:10.1001/jamainternmed.2019.1739

**eAppendix 1.** Relevant Choosing Wisely recommendations

**eFigure 1.** Study Timeline

**eFigure 2.** Study Cohort Flow Diagram

**eTable 1.** Cardiac Diagnoses

**eTable 2.** Excluding Diagnoses for Pre-Operative EKG

**eAppendix 2.** EKG and Comparison Group Definition

**eTable 3.** Cascade Tests

**eTable 4.** Cascade Procedures and Treatments

**eTable 5.** Physician Specialty Codes

**eTable 6.** Cascade New Diagnoses

**eTable 7.** Cascade Hospitalizations

**eTable 8.** Elixhauser Conditions in Order of Prevalence

**eTable 9.** Most Common Potential Cascade Treatments, New Diagnoses, and Hospitalization Primary Diagnoses, Rate Per 100 Beneficiaries During 90-Day Cascade Period

**eTable 10.** Cascade-Attributable Event Rates and Spending Following Pre-Operative Electrocardiogram for Cataract Surgery, Including Sensitivity Analysis

**eTable 11.** Characteristics Associated With Experience of Potential Cascade Among Beneficiaries Receiving Pre-Operative EKG for Cataract Surgery, Sensitivity Analysis

**eReferences.**

This supplementary material has been provided by the authors to give readers additional information about their work.

## **eAppendix 1.** Relevant Choosing Wisely recommendations

*A. American Academy of Ophthalmology:* Don't perform preoperative medical tests for eye surgery unless there are specific medical indications. For many, preoperative tests are not necessary because eye surgeries are not lengthy and don't pose serious risks. An EKG should be ordered if patients have heart disease. A blood glucose test should be ordered if patients have diabetes. A potassium test should be ordered if patients are on diuretics. In general, patients scheduled for surgery do not need medical tests unless the history or physical examination indicate the need for a test, e.g., the existence of conditions noted above. Institutional policies should consider these issues.<sup>1</sup>

*B. American Society for Clinical Pathology:* Avoid routine preoperative testing for low risk surgeries without a clinical indication. Most preoperative tests (typically a complete blood count, Prothrombin Time and Partial Prothomboplastin Time, basic metabolic panel and urinalysis) performed on elective surgical patients are normal. Findings influence management in under 3% of patients tested. In almost all cases, no adverse outcomes are observed when clinically stable patients undergo elective surgery, irrespective of whether an abnormal test is identified. Preoperative testing is appropriate in symptomatic patients and those with risks factors for which diagnostic testing can provide clarification of patient surgical risk.<sup>2</sup>

**eFigure 1.** Study timeline

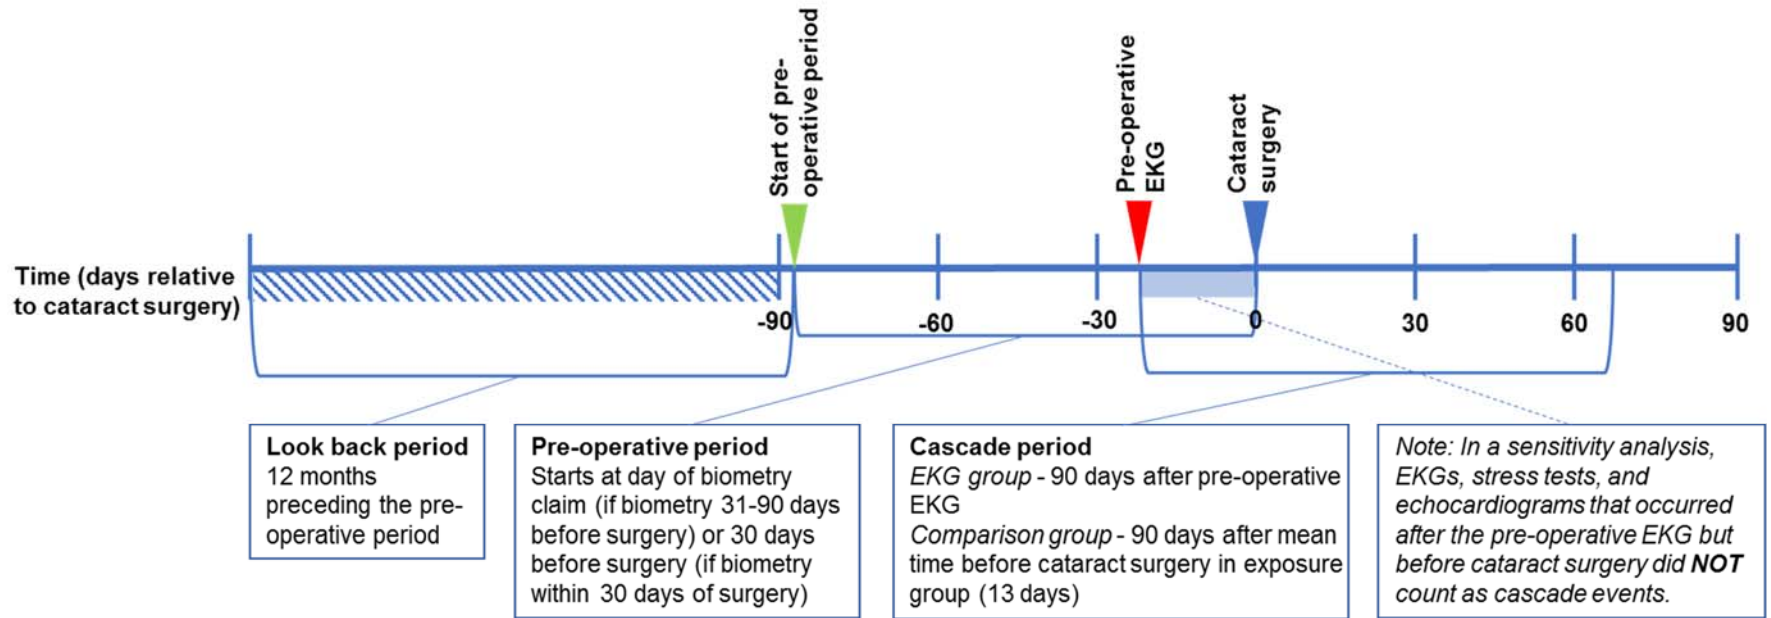

**eFigure 2.** Study Cohort Flow Diagram

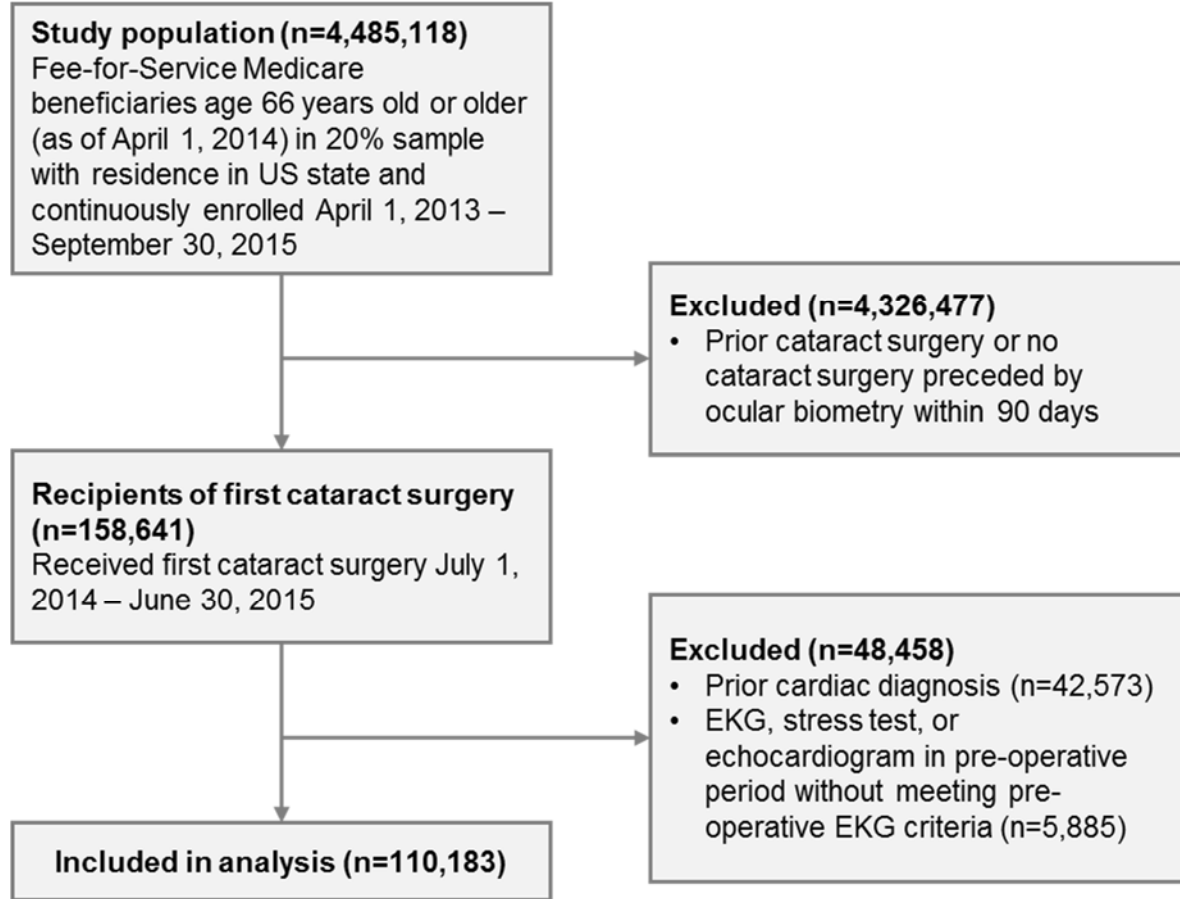

Definition of cataract surgery - Code for “cataract surgery” (Current Procedural Terminology (CPT) codes: 66982-4) with ophthalmology or ambulatory surgical center specialty code ((Centers for Medicare & Medicaid Services (CMS) specialty codes 18, 48; accounted for 93% of all cataract surgeries) and absence of “prior cataract surgery” code (International Classification of Disease (ICD-9) codes: V43.1, V45.61, 379.31). Definition based on previous literature<sup>3</sup> as well as empirical analysis and clinical review with an ophthalmology billing specialist and ophthalmologist.

Definition of ocular biometry - CPT codes: 76516, 76519, 92136

Definition of prior cataract surgery - Claim for “prior cataract surgery” (ICD-9 codes: V43.1, V45.61, 379.31) or claim for any “cataract surgery” (CPT codes: 66982-4, 66830, 66840, 66850, 66852, 66920, 66930, 66940, 66983-6 with ophthalmology or ambulatory surgical center specialty code) in 12 months preceding index cataract surgery.

Definition of prior cardiac diagnosis - Any diagnosis code in Appendix Table 1 that appeared in one inpatient claim or in two outpatient claims within the 12 months before the start of the preoperative period.

**eTable 1.** Cardiac diagnoses

| Diagnosis               | ICD-9 Codes*                                                                                                                                                                                                 |
|-------------------------|--------------------------------------------------------------------------------------------------------------------------------------------------------------------------------------------------------------|
| Coronary artery disease | 410, 410.0-1, 410.00-2, 410.10-2, 410.20-2, 410.30-2, 410.40-2, 410.50-2, 410.60-2, 410.70-2, 410.80-2, 410.90-2, 411.0-1, 411.81, 411.89, 412, 413.0-1, 413.9, 414.00-7, 414.10-2, 414.19, 414.2-4, 414.8-9 |
| Heart failure           | 398.91, 402.01, 402.11, 402.91, 404.01, 404.03, 404.11, 404.13, 404.91, 404.93, 428.0-1, 428.9, 428.20-3, 428.30-3, 428.40-3                                                                                 |
| Valvular disease        | 394.0-2, 394.9, 395.0-2, 395.9, 396.0-3, 396.8-9, 397.0-1, 397.9, 421.2, 424.0-3                                                                                                                             |
| Arrhythmia              | 426.0, 426.2-7, 426.10-13, 426.50-4, 426.81-2, 426.89, 426.9, 427.0-2, 427.9, 427.31-2, 427.41-2, 427.60-1, 427.69, 427.81, 427.89                                                                           |

\*Based on diagnoses in Medicare Chronic Conditions Data Warehouse

Pre-operative electrocardiogram (EKG) definition

Definition of pre-operative EKG - EKG (CPT codes: 93000, 93005, 93010, 93040-2, G0403-5) with pre-operative (ICD-9 codes: V7281-4, V7263) or cataract-related diagnosis code (ICD-9 codes: 366.00, 366.04, 366.10, 366.13, 366.15-7, 366.19, 366.30, 366.34, 366.8, 366.9) and no excluding diagnoses (eTable 2).

**eTable 2.** Excluding diagnoses for pre-operative EKG

| Diagnosis                | ICD-9 Codes       |
|--------------------------|-------------------|
| Chest pain               | 786.50-2, 786.59  |
| Dyspnea                  | 786.00-7, 786.09  |
| Bradycardia              | 427.89            |
| Congestive heart failure | 428.0             |
| Hypotension              | 458.9             |
| Lower extremity edema    | 782.3             |
| Tachycardia              | 785.0             |
| Palpitations             | 785.1             |
| Dizziness                | 780.4             |
| Syncope                  | 780.2             |
| Cardiac ischemia         | 410-410.92, 427.5 |
| Cardiac pacemaker        | V45.01            |

## **eAppendix 2.** EKG and comparison group definition

Definition of EKG group – Beneficiaries in cohort who received a pre-operative EKG using above definition

Definition of comparison group – Beneficiaries in cohort who did not receive any EKG, stress test, or echocardiogram during the pre-operative period.

Previous studies have defined pre-operative EKG, echocardiogram, and stress tests as any EKG, echocardiogram, or stress test occurring in the 30 days prior to cataract surgery, or between ocular biometry and cataract surgery.<sup>3-6</sup> Because our study focused on cascades of care (including EKGs) following pre-operative EKG, we could not rely on the timing of EKGs to define them as pre-operative. Therefore, we used diagnosis codes of inclusion and exclusion to define pre-operative EKGs. Because these diagnosis codes are specific but not sensitive markers of the clinician's intent, and because prior estimates of pre-operative EKG testing rates have been higher (suggesting many of these ambiguous tests were still intended as pre-operative), we excluded beneficiaries with ambiguous cardiac testing (i.e. those who did not have a pre-operative EKG (using our conservative definition) yet had an EKG, stress test, or echocardiogram in the pre-operative period) in order to create a reasonable comparison group (see Appendix Figure 1).

The EKG group did not similarly exclude beneficiaries who received a stress test or echocardiogram during the pre-operative period (2.4% of EKG group beneficiaries) as these tests may have been part of cascades. However, because cascade period EKGs, stress tests, and echocardiograms could also have been intended as pre-operative tests, we only counted them if they did not have a pre-operative diagnosis. Then in a sensitivity analysis to provide a lower bound on cascade events (i.e. under the assumption that ALL ambiguous tests were intended as pre-operative and therefore not cascades), we did not count any EKGs, stress tests, or echocardiograms as cascade events if they occurred before surgery.



Cascade event definition

**eTable 3.** Cascade tests

| Cascade pathway          | Cascade cardiac tests                          | CPT Codes                                                                                                                 |
|--------------------------|------------------------------------------------|---------------------------------------------------------------------------------------------------------------------------|
| Ischemic heart disease   | Troponin                                       | 84484                                                                                                                     |
|                          | Electrocardiogram (EKG)*                       | 93000, 93005, 93010, 93040-2, G0403-5, G0366-8, 3120F                                                                     |
|                          | Stress test*                                   | 93015-8, 93350-1, 93024, 75563                                                                                            |
|                          | Coronary computed tomography angiography (CTA) | 75571-4                                                                                                                   |
|                          | Coronary ultrasound                            | 92978-9                                                                                                                   |
|                          | Cardiac positron emission tomography (PET)     | 78459, 78466, 78468-9, 78483, 78491-2, 78499                                                                              |
| Structural heart disease | Brain natriuretic peptide (BNP)                | 83880                                                                                                                     |
|                          | Echocardiogram*                                | 93303-4, 93306-8, 93312-93318, 93320-1, 93325, 93350-2, 93355                                                             |
|                          | Cardiac magnetic resonance imaging (MRI)       | 75557, 75559, 75561, 75563, 75565                                                                                         |
|                          | Nuclear imaging                                | 78414, 78428, 78451-4, 78472-3, 78481, 78483, 78494, 78496                                                                |
| Arrhythmia               | Holter monitor                                 | 93224-7                                                                                                                   |
|                          | Event monitor                                  | 93228-9, 93232, 93268, 93270-2, 93278                                                                                     |
|                          | Implantable loop recorder                      | 33282, 33284, E0616                                                                                                       |
|                          | Electrophysiology testing                      | 93623<br>93600, 93602-3, 93609-10, 93612-3, 93615-6, 93618-22, 93624, 93631, 93640-2, 93644, 93650-4, 93656, 93660, 93662 |
|                          | Pacer evaluation                               | 93279-99                                                                                                                  |

\*Event excluded if pre-operative or cataract diagnosis or if occurred prior to cataract surgery

**eTable 4.** Cascade procedures and treatments

| Cascade pathway          | Cascade cardiac procedure                                 | CPT Codes                                                                                           |
|--------------------------|-----------------------------------------------------------|-----------------------------------------------------------------------------------------------------|
| Ischemic heart disease   | Coronary repair                                           | 33500,33501-5, 33507                                                                                |
|                          | Coronary artery bypass graft surgery                      | 33510-23, 33530, 33533-48, 33572                                                                    |
|                          | Percutaneous coronary angioplasty/cardiac catheterization | 92920-1, 92924-5, 92928-33, 92933-4, 92937-8, 92941, 92943-4, 92973, 92975, 92977, 92980-4, 92995-6 |
| Structural heart disease | Valve repair/replacement                                  | 33361-33403, 33405-18, 33420-30, 33460-5, 33474-5, 33478, 92986-7, 92990, 92992, 0343T              |
| Arrhythmia               | Electrophysiology procedures                              | 33250-66, 92960-1, 92970-1, 93655-7                                                                 |
|                          | Pacemaker procedures                                      | 93260-1, 33202-44, 33249, 33262-4, 33270-3, 92953                                                   |

Cascade visit definitions – Code for new patient visit (CPT codes: 99201-5) or established patient visit (CPT codes: 99211-5) billed by physician with cardiac specialty (Appendix Table 5). Visit for abnormal findings defined by ICD-9 codes 793.2, 794.30-1, 794.39, 796.4. We also examined codes for emergency department visits (99281-5), observation status visits (99218-20, 99224-6, 99234-6), hospital outpatient visits (G0463), and federally qualified health center visits (G0466-9) and found that each of these categories of codes were billed too infrequently to count.

**eTable 5.** Physician specialty codes

| Specialty group   | Specialty                                                       | Specialty code                                                                                           |
|-------------------|-----------------------------------------------------------------|----------------------------------------------------------------------------------------------------------|
| Primary care      | General practice                                                | 01                                                                                                       |
|                   | Family practice                                                 | 08                                                                                                       |
|                   | Internal medicine                                               | 11                                                                                                       |
|                   | Pediatric medicine                                              | 37                                                                                                       |
|                   | Geriatric medicine                                              | 38                                                                                                       |
|                   | Preventive medicine                                             | 84                                                                                                       |
| Cardiac specialty | Cardiology                                                      | 06                                                                                                       |
|                   | Cardiac electrophysiology                                       | 21                                                                                                       |
|                   | Cardiac surgery                                                 | 78                                                                                                       |
|                   | Interventional cardiology                                       | C3                                                                                                       |
| Other             | Includes ophthalmology, nurse practitioner, physician assistant | 02, 03, 05, 09, 10, 12-3, 18, 25, 29, 30, 33-4, 36, 39, 44, 46, 50, 63, 66, 70, 79, 81, 83, 90, 93, 97-9 |

Specialty codes used for definition of cardiac specialist visits and for specialty of physician performing the index EKG.

**eTable 6.** Cascade new diagnoses

| Cascade pathway          | Cascade new diagnosis type | ICD-9 Codes*                                                                                                                                                                                                 |
|--------------------------|----------------------------|--------------------------------------------------------------------------------------------------------------------------------------------------------------------------------------------------------------|
| Ischemic heart disease   |                            | 410, 410.0-1, 410.00-2, 410.10-2, 410.20-2, 410.30-2, 410.40-2, 410.50-2, 410.60-2, 410.70-2, 410.80-2, 410.90-2, 411.0-1, 411.81, 411.89, 412, 413.0-1, 413.9, 414.00-7, 414.10-2, 414.19, 414.2-4, 414.8-9 |
| Structural heart disease | Heart failure              | 398.91, 402.01, 402.11, 402.91, 404.01, 404.03, 404.11, 404.13, 404.91, 404.93, 428.0-1, 428.9, 428.20-3, 428.30-3, 428.40-3                                                                                 |
|                          | Valvular disease           | 394.0-2, 394.9, 395.0-2, 395.9, 396.0-3, 396.8-9, 397.0-1, 397.9, 421.2, 424.0-3                                                                                                                             |
| Arrhythmia               |                            | 426.0, 426.2-7, 426.10-13, 426.50-4, 426.81-2, 426.89, 426.9, 427.0-2, 427.9, 427.31-2, 427.41-2, 427.60-1, 427.69, 427.81, 427.89                                                                           |

\*Based on diagnoses in Medicare Chronic Conditions Data Warehouse. New diagnosis defined by diagnosis code on one inpatient claim or two outpatient claims during cascade period.

**eTable 7.** Cascade hospitalizations

| Cascade pathway          | Diagnosis-related group (DRG) codes                                                                                           |
|--------------------------|-------------------------------------------------------------------------------------------------------------------------------|
| Ischemic heart disease   | 410.01, 410.11, 410.21, 410.31, 410.70-2, 410.81, 410.91, 411.1, 413.1, 414.00-1, 440.29                                      |
| Structural heart disease | 426.0, 426.12-3, 427.0-1, 427.31-2, 427.41, 427.69, 427.81, 427.89, 427.9, 785.0                                              |
| Arrhythmia               | 396.8, 402.91, 404.01, 420.9-1, 423.0, 423.8-9, 424.1, 425.4, 428.0, 428.21, 428.23, 428.31, 428.33, 428.40-1, 428.43, 429.83 |

Determined empirically based on clinical review of hospitalizations in study cohort and cardiac diagnoses in Medicare Chronic Conditions Data Warehouse (Appendix Tables 1, 6).

**eTable 8.** Prior Elixhauser conditions in order of prevalence

| Condition      | EKG group | Comparison group |
|----------------|-----------|------------------|
| Hypertension   | 38.08%    | 36.78%           |
| Diabetes       | 14.98%    | 14.75%           |
| Hypothyroidism | 9.31%     | 9.04%            |

**eTable 9.** Most common potential cascade treatments, new diagnoses, and hospitalization primary diagnoses, rate per 100 beneficiaries during 90 day cascade period

| EKG group (N=12,408)                     |                                                          |                                               | Comparison group (N=97,775) |                                                          |                                               |
|------------------------------------------|----------------------------------------------------------|-----------------------------------------------|-----------------------------|----------------------------------------------------------|-----------------------------------------------|
| <i>Treatments</i>                        |                                                          |                                               |                             |                                                          |                                               |
| Rank                                     | Event                                                    | Rate per 100 beneficiaries (number of events) | Rank                        | Event                                                    | Rate per 100 beneficiaries (number of events) |
| 1                                        | PTCA                                                     | 0.23 (28)                                     | 1                           | PTCA                                                     | 0.12 (121)                                    |
| 1                                        | CABG                                                     | 0.23 (28)                                     | 2                           | CABG                                                     | 0.11 (105)                                    |
| 2                                        | Pacemaker placement                                      | <0.09 (<11)                                   | 3                           | Pacemaker placement                                      | 0.08 (79)                                     |
| 3                                        | Electrophysiology                                        | <0.09 (<11)                                   | 4                           | Electrophysiology                                        | 0.06 (57)                                     |
| 4                                        | Valve repair                                             | <0.09 (<11)                                   | 5                           | Valve repair                                             | <0.01 (<11)                                   |
| <i>New diagnoses</i>                     |                                                          |                                               |                             |                                                          |                                               |
| 1                                        | Coronary artery disease                                  | 3.55 (440)                                    | 1                           | Coronary artery disease                                  | 3.20 (3,125)                                  |
| 2                                        | Heart failure/<br>Cardiomyopathy                         | 0.94 (117)                                    | 2                           | Heart failure/<br>Cardiomyopathy                         | 1.48 (1,445)                                  |
| 3                                        | Diseases of mitral and<br>aortic valves                  | 0.70 (87)                                     | 3                           | Diseases of mitral and<br>aortic valves                  | 0.52 (506)                                    |
| 4                                        | Conduction disorders                                     | 0.21 (26)                                     | 4                           | Conduction disorders                                     | 0.11 (109)                                    |
| 5                                        | Diseases of tricuspid<br>valve                           | <0.09 (<11)                                   | 5                           | Diseases of tricuspid<br>valve                           | 0.06 (58)                                     |
| <i>Hospitalization primary diagnoses</i> |                                                          |                                               |                             |                                                          |                                               |
| 1                                        | Subendocardial<br>infarction, initial episode<br>of care | 0.11 (14)                                     | 1                           | Atrial fibrillation                                      | 0.05 (50)                                     |
| 2                                        | Coronary atherosclerosis<br>of native coronary           | <0.09 (<11)                                   | 2                           | Subendocardial<br>infarction, initial<br>episode of care | 0.05 (49)                                     |
| 3                                        | Atrial fibrillation                                      | <0.09 (<11)                                   | 3                           | Coronary<br>atherosclerosis of native<br>coronary        | 0.04 (39)                                     |
| 4                                        | Congestive heart failure                                 | <0.09 (<11)                                   | 4                           | Diastolic heart failure                                  | 0.02 (15)                                     |
| 5                                        | Aortic valve disorder                                    | <0.09 (<11)                                   | 5                           | Acute MI inferior wall,<br>initial episode               | 0.01 (14)                                     |

PTCA = Percutaneous transluminal coronary angioplasty; CABG = Coronary artery bypass graft

**eTable 10.** Cascade-Attributable Event Rates and Spending Following Pre-Operative Electrocardiogram for Cataract Surgery, Including Sensitivity Analysis

| Event rate per 100 beneficiaries                                                        | EKG group (N=12,408) | Comparison group (N=97,775) | Cascade-attributable event rate | Adjusted cascade-attributable event rate (95%CI) <sup>a</sup> |
|-----------------------------------------------------------------------------------------|----------------------|-----------------------------|---------------------------------|---------------------------------------------------------------|
| All events <sup>b</sup>                                                                 | 44.4 (5,506)         | 37.0 (36,173)               | 7.4                             | 5.11 <sup>c</sup> (3.96-6.25)                                 |
| All events                                                                              | 50.4 (6,259)         | 37.0 (36,173)               | 13.4                            | 10.92 <sup>c</sup> (9.76-12.08)                               |
| All tests <sup>b</sup>                                                                  | 23.4 (2,901)         | 19.9 (19,488)               | 3.5                             | 2.18 <sup>c</sup> (1.34-3.02)                                 |
| All tests                                                                               | 29.5 (3,654)         | 19.9 (19,488)               | 9.6                             | 7.98 <sup>c</sup> (7.12-8.84)                                 |
| All treatments                                                                          | 0.6 (74)             | 0.4 (368)                   | 0.22                            | 0.33 <sup>c</sup> (0.19-0.46)                                 |
| <i>Tests and treatments</i>                                                             |                      |                             |                                 |                                                               |
| Electrocardiogram <sup>b</sup>                                                          | 11.5 (1,427)         | 10.7 (10,471)               | 0.79                            | -0.19 <sup>c</sup> (-0.79-0.41)                               |
| Electrocardiogram                                                                       | 13.7 (1,697)         | 10.7 (10,471)               | 3.0                             | 1.81 <sup>c</sup> (1.20-2.42)                                 |
| Stress test <sup>b</sup>                                                                | 2.4 (297)            | 2.0 (1,928)                 | 0.42                            | 0.36 <sup>c</sup> (0.10-0.63)                                 |
| Stress test                                                                             | 4.1 (503)            | 2.0 (1,928)                 | 2.1                             | 2.03 <sup>c</sup> (1.74-2.32)                                 |
| Echocardiogram <sup>b</sup>                                                             | 4.7 (582)            | 3.7 (3,625)                 | 0.98                            | 0.75 <sup>c</sup> (0.38-1.11)                                 |
| Echocardiogram                                                                          | 6.9 (859)            | 3.7 (3,625)                 | 3.2                             | 2.90 <sup>c</sup> (2.51-3.28)                                 |
| Myocardial perfusion test                                                               | 2.1 (259)            | 1.1 (1,065)                 | 1.0                             | 0.94 <sup>c</sup> (0.73-1.15)                                 |
| Event/Holter monitor                                                                    | 1.6 (204)            | 0.9 (916)                   | 0.71                            | 0.68 <sup>c</sup> (0.49-0.88)                                 |
| Cardiac catheterization                                                                 | 0.2 (28)             | 0.1 (121)                   | 0.10                            | 0.15 <sup>c</sup> (0.07-0.23)                                 |
| <i>Visits and hospitalizations</i>                                                      |                      |                             |                                 |                                                               |
| All cardiac specialist visits                                                           | 9.6 (1,196)          | 7.2 (7,060)                 | 2.4                             | 1.27 <sup>c</sup> (0.78-1.76)                                 |
| New patient cardiac specialist visit                                                    | 2.7 (336)            | 1.2 (1,146)                 | 1.5                             | 1.40 <sup>c</sup> (1.18-1.62)                                 |
| Cardiac specialist visit for abnormal finding                                           | 1.0 (122)            | 0.3 (262)                   | 0.72                            | 0.57 <sup>c</sup> (0.46-0.68)                                 |
| Cardiac hospitalizations                                                                | 0.4 (49)             | 0.3 (284)                   | 0.10                            | 0.15 <sup>c</sup> (0.04-0.26)                                 |
| <i>Diagnoses</i>                                                                        |                      |                             |                                 |                                                               |
| New cardiac diagnoses                                                                   | 10.4 (1,286)         | 9.2 (8,973)                 | 1.2                             | 1.21 <sup>c</sup> (0.62-1.79)                                 |
| <i>Medicare spending per beneficiary</i>                                                |                      |                             |                                 |                                                               |
| Allowable charges related to cascade events in 90-day period, \$ mean (SD) <sup>b</sup> | 1,778 (14,487)       | 1,201 (10,999)              | 577                             | 559 <sup>c</sup> (342-775)                                    |
| Allowable charges related to cascade events in 90-day period, \$ mean (SD)              | 1,789 (14,489)       | 1,201 (10,999)              | 588                             | 565 <sup>c</sup> (348-781)                                    |
| Total Medicare allowable charges in 90-day period, \$ mean (SD)                         | 11,666 (22,235)      | 9,880 (18,021)              | 1,786                           | 1,707 <sup>c</sup> (1,358-2,055)                              |

Table 2. <sup>a</sup>The multivariable model included the following covariates: age, sex, race, Medicaid enrollment, Elixhauser condition count, disability (reason for Medicare eligibility), end stage renal disease (reason for Medicare eligibility), and setting of residence. <sup>b</sup>Sensitivity analysis in which no electrocardiogram, stress test, or echocardiogram performed during the cascade period but before cataract surgery was counted as a cascade event. <sup>c</sup>Statistically significant at p<0.05.



**eTable 11.** Characteristics Associated with Experience of Potential Cascade Among Beneficiaries Receiving Pre-Operative EKG for Cataract Surgery, Sensitivity Analysis

| Characteristic                                                    |                        | Experienced potential cascade (N=1,823) | Did not experience potential cascade (N=10,585) | Adjusted Odds Ratio, 95% CI <sup>b</sup> |
|-------------------------------------------------------------------|------------------------|-----------------------------------------|-------------------------------------------------|------------------------------------------|
| Age in years, % (n)                                               | 66-74                  | 47.2 (861)                              | 56.7 (5,997)                                    | 1 [Reference]                            |
|                                                                   | 75-84                  | 43.9 (800)                              | 36.4 (3,853)                                    | 1.44 <sup>c</sup> (1.29-1.60)            |
|                                                                   | ≥85                    | 8.9 (162)                               | 6.9 (735)                                       | 1.48 <sup>c</sup> (1.23-1.78)            |
| Female sex                                                        |                        | 64.5 (1,176)                            | 65.8 (6,969)                                    | 0.93 (0.84-1.03)                         |
| Race, % (n)                                                       | White                  | 83.1 (1,514)                            | 85.2 (9,019)                                    | 1 [Reference]                            |
|                                                                   | Black                  | 6.9 (125)                               | 5.4 (571)                                       | 1.12 (0.91-1.38)                         |
|                                                                   | Hispanic               | 5.7 (103)                               | 4.4 (464)                                       | 1.19 (0.94-1.51)                         |
|                                                                   | Other                  | 4.4 (81)                                | 5.0 (531)                                       | 0.86 (0.67-1.11)                         |
| Medicaid enrollment, % (n)                                        |                        | 7.1 (129)                               | 5.6 (591)                                       | 1.12 (0.91-1.39)                         |
| Setting of residence, % (n)                                       | Metropolitan           | 84.7 (1,544)                            | 83.2 (8,802)                                    | 1 [Reference]                            |
|                                                                   | Micropolitan           | 7.7 (141)                               | 9.4 (994)                                       | 0.90 (0.74-1.09)                         |
|                                                                   | Suburban               | 4.3 (79)                                | 4.2 (445)                                       | 1.12 (0.87-1.45)                         |
|                                                                   | Rural                  | 3.2 (59)                                | 3.3 (344)                                       | 1.12 (0.83-1.49)                         |
| Elixhauser condition count, mean (SD)                             |                        | 1.4 (1.5)                               | 1.0 (1.3)                                       | 1.20 <sup>c</sup> (1.16-1.24)            |
| Physician ordering pre-operative EKG, % (n)                       | Primary care physician | 68.2 (1,244)                            | 72.5 (7,677)                                    | 1 [Reference]                            |
|                                                                   | Cardiac specialist     | 19.3 (353)                              | 16.3 (1,722)                                    | 1.33 <sup>c</sup> (1.16-1.52)            |
|                                                                   | Other                  | 12.4 (226)                              | 11.2 (1,186)                                    | 1.18 (1.01-1.38)                         |
| Practice region, % (n)                                            | Northeast              | 35.0 (638)                              | 32.6 (3,446)                                    | 0.92 (0.75-1.12)                         |
|                                                                   | South                  | 32.9 (599)                              | 32.0 (3,387)                                    | 1.06 (0.88-1.26)                         |
|                                                                   | West                   | 16.5 (300)                              | 18.0 (1,903)                                    | 1.01 (0.82-1.25)                         |
|                                                                   | Midwest                | 15.7 (286)                              | 17.5 (1,849)                                    | 1 [Reference]                            |
| Cardiologists per 10,000 residents in HRR, mean (SD) <sup>a</sup> |                        | 7.6 (2.1)                               | 7.4 (2.0)                                       | 1.07 <sup>c</sup> (1.03-1.11)            |

Table 3. Abbreviation: HRR is hospital referral region. <sup>a</sup> Dartmouth Atlas, 2011. <sup>b</sup> Among beneficiaries who received a pre-operative EKG, we compared those who did or did not experience a potential cascade using univariate analyses and multivariable logistic regression in which the primary outcome was experience of the cascade and the predictors were all characteristics included in the table and HRR random effects. In this sensitivity analysis, we did not count any EKGs, stress tests, or echocardiograms occurring prior to cataract surgery as cascade events. <sup>c</sup> Statistically significant at p<0.05.

## eReferences.

1. American Academy of Ophthalmology. Choosing Wisely: Don't perform preoperative medical tests for eye surgery unless there are specific medical indications. <http://www.choosingwisely.org/clinician-lists/american-academy-ophthalmology-preoperative-medical-tests-for-eye-surgery/>. Published February 21, 2013. Accessed December 11, 2018.
2. American Society for Clinical Pathology. Choosing Wisely: Avoid routine preoperative testing for low risk surgeries without a clinical indication. <http://www.choosingwisely.org/clinician-lists/american-society-clinical-pathology-routine-preop-testing-for-low-risk-surgeries-without-indication/>. Published February 13, 2013. Accessed December 11, 2018.
3. Chen CL, Clay TH, McLeod S, Chang H-YP, Gelb AW, Dudley RA. A Revised Estimate of Costs Associated With Routine Preoperative Testing in Medicare Cataract Patients With a Procedure-Specific Indicator. *JAMA Ophthalmol*. 2018;136(3):231-238.
4. Colla CH, Morden NE, Sequist TD, Schpero WL, Rosenthal MB. Choosing Wisely: Prevalence and Correlates of Low-Value Health Care Services in the United States. *J Gen Intern Med*. 2014;30(2):221-228.
5. Schwartz AL, Landon BE, Elshaug AG, Chernew ME, McWilliams JM. Measuring Low-Value Care in Medicare. *JAMA Intern Med*. 2014;174(7):1067-1076.
6. Chen CL, Lin GA, Bardach NS, et al. Preoperative medical testing in Medicare patients undergoing cataract surgery. *N Engl J Med*. 2015;372(16):1530-1538.
